# Supplementary material for: Nebulizing novel multifunctional nanovesicles: the impact of macrophage-targeted-pH-sensitive archaeosomes on a pulmonary surfactant
Source: Royal Society of Chemistry journal article supplement (doi:10.1039/c7tb01694h), 2017-01-01
Supplement: c7tb01694h1.pdf [file c7tb01694h1.pdf]

# **Nebulizing novel multifunctional nanovesicles: the impact of macrophage-targeted-pH-sensitive archaeosomes on pulmonary surfactant**

Maria Julia Altube<sup>1</sup>, Andrea Cutro<sup>2</sup>, Laura Bakas<sup>3</sup>, Maria Jose Morilla<sup>1</sup>, Edgardo Anibal Disalvo<sup>2</sup> and Eder Lilia Romero<sup>1\*</sup>

1 Nanomedicine Research Program-2, Science and Technology Department, National University of Quilmes, Bernal, Buenos Aires, Argentina

2 Laboratory of Biointerphases and Biomimetic Systems, (CITSE) National University of Santiago del Estero and CONICET, 4206, RN 9- Km 1125, Santiago del Estero, Argentina.

3 Vegetal Proteins Research Laboratory (LIPROVE), Exact Sciences Faculty, National University of La Plata, Buenos Aires, Argentina.

\* Corresponding Author: [elromero@unq.edu.ar](mailto:elromero@unq.edu.ar)

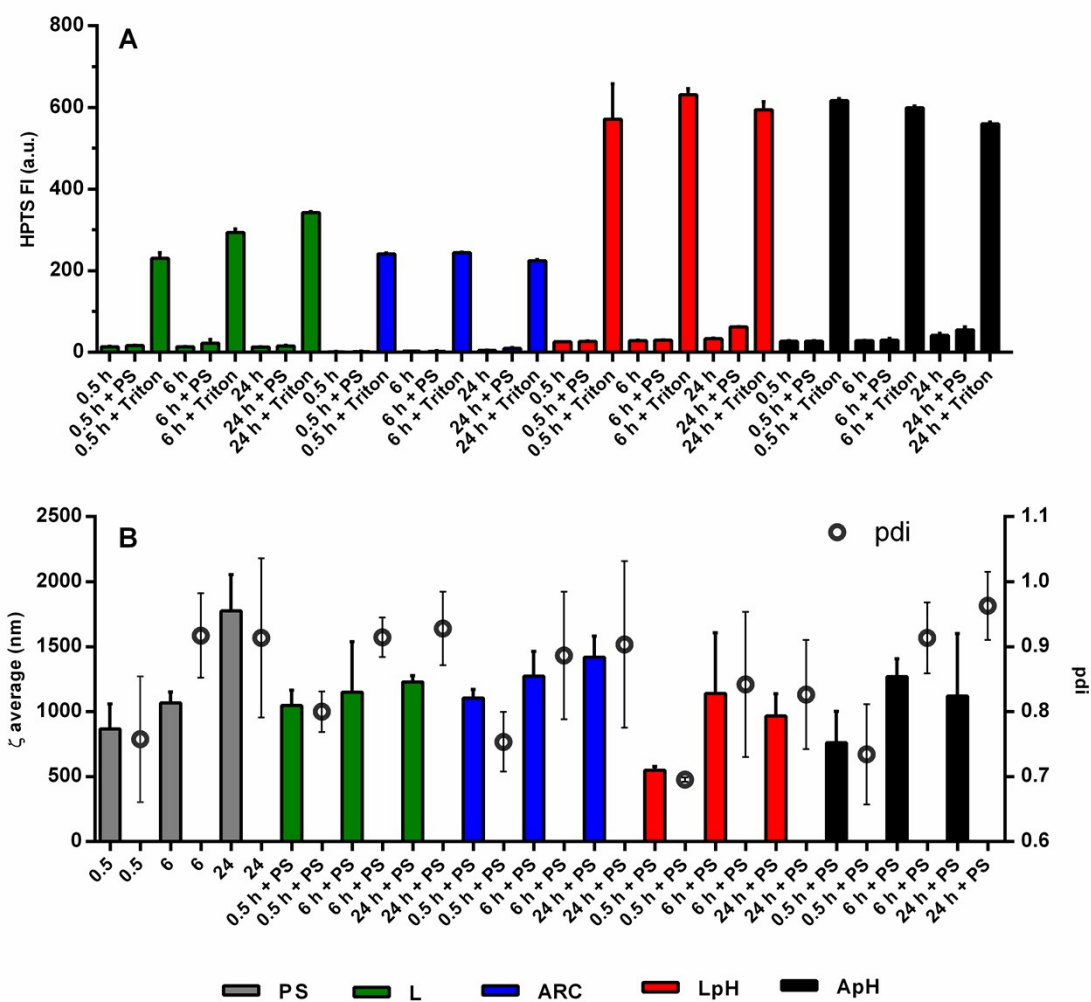

**Figure S1:** HPTS Fluorescence Intensity (a), Z average and PDI (b) of nanovesicles alone and after contacting PS vesicles or Triton as a function of time.
